# Supplementary material
Source: PubMed Central journal article supplement (PMC8231715)
Supplement: aem00178-21_supp_4_seq11.pdf [file aem00178-21_supp_4_seq11.pdf]

**Table S1.** Post-hoc pairwise Student's t-test results for the zones of inhibition of *Escovopsis* spp. by all 32 *Burkholderiaceae* isolates

|          | n | mean   | sd      | ICBG1719 | ICBG1720 | ICBG1735 | ICBG1724 | SID20373 | SID20355 | SID20345 | SID20349 | SID20390 | SID20384 | SID20378 | SID20392 | SID20365 | ICBG637 | ICBG955 | ICBG849 | SID20336 | ICBG860 | SID20340 | SID21199 | SID21202 | SID21203 | SID21204 | SID21206 | SID21208 | SID21210 | SID21211 | SID21212 | SID21213 | SID21214 | SID21215 | SID21216 |        |        |
|----------|---|--------|---------|----------|----------|----------|----------|----------|----------|----------|----------|----------|----------|----------|----------|----------|---------|---------|---------|----------|---------|----------|----------|----------|----------|----------|----------|----------|----------|----------|----------|----------|----------|----------|----------|--------|--------|
| ICBG1719 | 8 | 2.5079 | 0.15035 |          | 0.8007   | 0.7993   | 0.3924   | 0.2717   | 0.0002   | <0.001   | <0.001   | <0.001   | <0.001   | <0.001   | <0.001   | <0.001   | <0.001  | <0.001  | <0.001  | <0.001   | <0.001  | <0.001   | <0.001   | <0.001   | <0.001   | <0.001   | <0.001   | <0.001   | <0.001   | <0.001   | <0.001   | <0.001   | <0.001   | <0.001   | <0.001   | <0.001 | <0.001 |
| ICBG1720 | 8 | 2.4541 | 0.15035 | 0.8007   |          | 0.9986   | 0.2684   | 0.177    | 0.0005   | <0.001   | <0.001   | <0.001   | <0.001   | <0.001   | <0.001   | <0.001   | <0.001  | <0.001  | <0.001  | <0.001   | <0.001  | <0.001   | <0.001   | <0.001   | <0.001   | <0.001   | <0.001   | <0.001   | <0.001   | <0.001   | <0.001   | <0.001   | <0.001   | <0.001   | <0.001   | <0.001 | <0.001 |
| ICBG1735 | 8 | 2.4538 | 0.15035 | 0.7993   | 0.9986   |          | 0.2676   | 0.1764   | 0.0005   | <0.001   | <0.001   | <0.001   | <0.001   | <0.001   | <0.001   | <0.001   | <0.001  | <0.001  | <0.001  | <0.001   | <0.001  | <0.001   | <0.001   | <0.001   | <0.001   | <0.001   | <0.001   | <0.001   | <0.001   | <0.001   | <0.001   | <0.001   | <0.001   | <0.001   | <0.001   | <0.001 | <0.001 |
| ICBG1724 | 8 | 2.6901 | 0.15035 | 0.3924   | 0.2684   | 0.2676   |          | 0.8066   | <0.001   | <0.001   | <0.001   | <0.001   | <0.001   | <0.001   | <0.001   | <0.001   | <0.001  | <0.001  | <0.001  | <0.001   | <0.001  | <0.001   | <0.001   | <0.001   | <0.001   | <0.001   | <0.001   | <0.001   | <0.001   | <0.001   | <0.001   | <0.001   | <0.001   | <0.001   | <0.001   | <0.001 | <0.001 |
| SID20373 | 8 | 2.7423 | 0.15035 | 0.2717   | 0.177    | 0.1764   | 0.8066   |          | <0.001   | <0.001   | <0.001   | <0.001   | <0.001   | <0.001   | <0.001   | <0.001   | <0.001  | <0.001  | <0.001  | <0.001   | <0.001  | <0.001   | <0.001   | <0.001   | <0.001   | <0.001   | <0.001   | <0.001   | <0.001   | <0.001   | <0.001   | <0.001   | <0.001   | <0.001   | <0.001   | <0.001 |        |
| SID20355 | 8 | 1.6995 | 0.15035 | 0.0002   | 0.0005   | 0.0005   | <0.001   | <0.001   |          | <0.001   | <0.001   | 0.0002   | 0.0009   | <0.001   | <0.001   | 0.0022   | 0.0001  | 0.0021  | <0.001  | <0.001   | <0.001  | 0.0009   | 0.0853   | 0.1161   | 0.1341   | 0.0362   | <0.001   | 0.3252   | 0.1517   | <0.001   | 0.1861   | 0.2488   | 0.0015   | 0.118    |          |        |        |
| SID20345 | 8 | 0.8291 | 0.15035 | <0.001   | <0.001   | <0.001   | <0.001   | <0.001   | <0.001   |          | 0.0002   | 0.7989   | 0.4755   | 0.6445   | 0.8248   | 0.3254   | 0.8856  | 0.3306  | 0.0042  | 0.0031   | 0.0003  | 0.0103   | 0.9759   | 0.0407   | 0.0282   | 0.0234   | 0.1402   | 0.7938   | 0.0099   | 0.0327   | 0.0207   | 0.0247   | 0.0091   | 0.5704   | 0.0276   |        |        |
| SID20349 | 8 | 0.0246 | 0.15035 | <0.001   | <0.001   | <0.001   | <0.001   | <0.001   | <0.001   |          | 0.0002   | <0.001   | <0.001   | 0.0011   | 0.0005   | <0.001   | 0.0001  | <0.001  | 0.3761  | 0.4325   | 0.8893  | 0.2346   | 0.0025   | <0.001   | <0.001   | <0.001   | <0.001   | 0.0014   | <0.001   | <0.001   | 0.2434   | <0.001   | <0.001   | <0.001   | <0.001   |        |        |
| SID20390 | 8 | 0.8834 | 0.15035 | <0.001   | <0.001   | <0.001   | <0.001   | <0.001   | 0.0002   | 0.7989   | <0.001   |          | 0.6462   | 0.4741   | 0.6341   | 0.4658   | 0.9116  | 0.4723  | 0.0019  | 0.0014   | 0.0001  | 0.0049   | 0.8117   | 0.0697   | 0.0497   | 0.0418   | 0.2101   | 0.619    | 0.0183   | 0.0554   | 0.011    | 0.0428   | 0.0175   | 0.7401   | 0.0488   |        |        |
| SID20384 | 8 | 0.9811 | 0.15035 | <0.001   | <0.001   | <0.001   | <0.001   | <0.001   | 0.0009   | 0.4755   | <0.001   | 0.6462   |          | 0.2407   | 0.3502   | 0.7867   | 0.5688  | 0.7948  | 0.0004  | 0.0003   | <0.001  | 0.0011   | 0.54     | 0.1635   | 0.1229   | 0.1061   | 0.3941   | 0.3568   | 0.0495   | 0.1291   | 0.0031   | 0.1034   | 0.0501   | 0.9257   | 0.121    |        |        |
| SID20378 | 8 | 0.7309 | 0.15035 | <0.001   | <0.001   | <0.001   | <0.001   | <0.001   | <0.001   | 0.6445   | 0.0011   | 0.4741   | 0.2407   |          | 0.8102   | 0.1492   | 0.5451  | 0.1522  | 0.0158  | 0.012    | 0.0017  | 0.0345   | 0.7289   | 0.0137   | 0.009    | 0.0073   | 0.0607   | 0.8683   | 0.003    | 0.0114   | 0.0582   | 0.0083   | 0.0025   | 0.3204   | 0.0088   |        |        |
| SID20392 | 8 | 0.782  | 0.15035 | <0.001   | <0.001   | <0.001   | <0.001   | <0.001   | <0.001   | 0.8248   | 0.0005   | 0.6341   | 0.3502   | 0.8102   |          | 0.2287   | 0.715   | 0.2328  | 0.0081  | 0.0061   | 0.0008  | 0.0188   | 0.8803   | 0.0246   | 0.0166   | 0.0136   | 0.0954   | 0.9549   | 0.0057   | 0.02     | 0.0346   | 0.0149   | 0.005    | 0.4401   | 0.0162   |        |        |
| SID20365 | 8 | 1.0388 | 0.15035 | <0.001   | <0.001   | <0.001   | <0.001   | <0.001   | 0.0022   | 0.3254   | <0.001   | 0.4658   | 0.7867   | 0.1492   | 0.2287   |          | 0.4009  | 0.9916  | 0.0001  | <0.001   | <0.001  | 0.0004   | 0.4046   | 0.2525   | 0.1956   | 0.1714   | 0.5383   | 0.2416   | 0.0836   | 0.1999   | 0.0014   | 0.1636   | 0.087    | 0.731    | 0.1929   |        |        |
| ICBG637  | 8 | 0.8598 | 0.15035 | <0.001   | <0.001   | <0.001   | <0.001   | <0.001   | 0.0001   | 0.8856   | 0.0001   | 0.9116   | 0.5688   | 0.5451   | 0.715    | 0.4009   |         | 0.4068  | 0.0027  | 0.0019   | 0.0002  | 0.0068   | 0.8826   | 0.0554   | 0.039    | 0.0326   | 0.1771   | 0.6932   | 0.0141   | 0.0443   | 0.0145   | 0.0339   | 0.0133   | 0.664    | 0.0383   |        |        |
| ICBG955  | 8 | 1.0365 | 0.15035 | <0.001   | <0.001   | <0.001   | <0.001   | <0.001   | 0.0021   | 0.3306   | <0.001   | 0.4723   | 0.7948   | 0.1522   | 0.2328   | 0.9916   |         | 0.4068  |         | 0.0001   | <0.001  | 0.0005   | 0.4095   | 0.2485   | 0.1923   | 0.1684   | 0.5322   | 0.2456   | 0.082    | 0.1966   | 0.0014   | 0.1608   | 0.0852   | 0.7383   | 0.1896   |        |        |
| ICBG849  | 8 | 0.2133 | 0.15035 | <0.001   | <0.001   | <0.001   | <0.001   | <0.001   | <0.001   | 0.0042   | 0.3761   | 0.0019   | 0.0004   | 0.0158   | 0.0081   | 0.0001   | 0.0027  | 0.0001  |         | 0.92     | 0.92    | 0.4555   | 0.7606   | 0.0206   | <0.001   | <0.001   | <0.001   | 0.0165   | <0.001   | <0.001   | 0.7277   | <0.001   | <0.001   | 0.0014   | <0.001   |        |        |
| SID20336 | 8 | 0.1919 | 0.15035 | <0.001   | <0.001   | <0.001   | <0.001   | <0.001   | <0.001   | 0.0031   | 0.4325   | 0.0014   | 0.0003   | 0.012    | 0.0061   | <0.001   | 0.0019  | 0.0001  |         | 0.92     | 0.5182  | 0.6854   | 0.0166   | <0.001   | <0.001   | <0.001   | <0.001   | 0.0128   | <0.001   | <0.001   | 0.6591   | <0.001   | <0.001   | 0.0001   | <0.001   |        |        |
| ICBG860  | 8 | 0.0543 | 0.15035 | <0.001   | <0.001   | <0.001   | <0.001   | <0.001   | <0.001   | 0.0003   | 0.8893   | 0.0001   | <0.001   | 0.0017   | 0.0008   | <0.001   | 0.0002  | <0.001  | 0.4555  | 0.5182   |         | 0.2937   | 0.0036   | <0.001   | <0.001   | <0.001   | 0.0021   | <0.001   | <0.001   | 0.2992   | <0.001   | <0.001   | 0.0001   | <0.001   |          |        |        |
| SID20340 | 8 | 0.2781 | 0.15035 | <0.001   | <0.001   | <0.001   | <0.001   | <0.001   | <0.001   | 0.0103   | 0.2346   | 0.0049   | 0.0011   | 0.0345   | 0.0188   | 0.0004   | 0.0068  | 0.0005  | 0.7606  | 0.6854   | 0.2937  |          | 0.0383   | <0.001   | <0.001   | <0.001   | 0.0002   | 0.0338   | <0.001   | <0.001   | 0.9473   | <0.001   | <0.001   | 0.0034   | <0.001   |        |        |
| SID21199 | 4 | 0.8213 | 0.21262 | <0.001   | <0.001   | <0.001   | <0.001   | <0.001   | 0.0009   | 0.9759   | 0.0025   | 0.8117   | 0.54     | 0.7289   | 0.8803   | 0.4046   | 0.8826  | 0.4095  | 0.0206  | 0.0166   | 0.0036  | 0.0383   |          | 0.0813   | 0.0618   | 0.0537   | 0.1999   | 0.8492   | 0.0262   | 0.065    | 0.0559   | 0.0525   | 0.0268   | 0.6147   | 0.0609   |        |        |
| SID21202 | 6 | 1.3023 | 0.1736  | <0.001   | <0.001   | <0.001   | <0.001   | <0.001   | 0.0853   | 0.0407   | <0.001   | 0.0697   | 0.1635   | 0.0137   | 0.0246   | 0.2525   | 0.0554  | 0.2485  | <0.001  | <0.001   | <0.001  | 0.8335   | 0.6581   | 0.0311   | 0.54     | 0.8515   | <0.001   | 0.7698   | 0.5928   | 0.1644   | 0.882    |          |          |          |          |        |        |
| SID21203 | 6 | 1.337  | 0.1736  | <0.001   | <0.001   | <0.001   | <0.001   | <0.001   | 0.1161   | 0.0282   | <0.001   | 0.0497   | 0.1229   | 0.009    | 0.0166   | 0.1956   | 0.039   | 0.1923  | <0.001  | <0.001   | <0.001  | <0.001   | 0.0618   | 0.8879   |          | 0.9449   | 0.564    | 0.0218   | 0.6323   | 0.9579   | <0.001   | 0.8743   | 0.6937   | 0.126    | 0.994    |        |        |
| SID21204 | 6 | 1.354  | 0.1736  | <0.001   | <0.001   | <0.001   | <0.001   | <0.001   | 0.1341   | 0.0234   | <0.001   | 0.0418   | 0.1061   | 0.0073   | 0.0136   | 0.1714   | 0.0326  | 0.1684  | <0.001  | <0.001   | <0.001  | <0.001   | 0.0537   | 0.8335   | 0.9449   |          | 0.5204   | 0.0182   | 0.6799   | 0.9895   | <0.001   | 0.9265   | 0.7454   | 0.1099   | 0.9508   |        |        |
| SID21206 | 5 | 1.1882 | 0.19017 | <0.001   | <0.001   | <0.001   | <0.001   | <0.001   | 0.0362   | 0.1402   | <0.001   | 0.2101   | 0.3941   | 0.0607   | 0.0954   | 0.5383   | 0.1771  | 0.5322  | <0.001  | <0.001   | <0.001  | 0.0002   | 0.1999   | 0.6581   | 0.564    | 0.5204   |          | 0.1052   | 0.3128   | 0.5467   | 0.0006   | 0.4817   | 0.3413   | 0.3759   | 0.5592   |        |        |
| SID21208 | 6 | 0.769  | 0.1736  | <0.001   | <0.001   | <0.001   | <0.001   | <0.001   | <0.001   | 0.7938   | 0.0014   | 0.619    | 0.3568   | 0.8683   | 0.9549   | 0.2416   | 0.6932  | 0.2456  | 0.0165  | 0.0128   | 0.0021  | 0.0338   | 0.8492   | 0.0311   | 0.0218   | 0.0182   | 0.1052   |          | 0.0079   | 0.025    | 0.0542   | 0.0191   | 0.0074   | 0.4383   | 0.0213   |        |        |
| SID21210 | 5 | 1.4604 | 0.19017 | <0.001   | <0.001   | <0.001   | <0.001   | <0.001   | 0.3252   | 0.0099   | <0.001   | 0.0183   | 0.0495   | 0.003    | 0.0057   | 0.0836   | 0.0141  | 0.082   | <0.001  | <0.001   | <0.001  | 0.0262   | 0.654    | 0.6323   | 0.6799   | 0.3128   |          | 0.0079   | 0.6835   | <0.001   | 0.7591   | 0.9179   | 0.0533   | 0.6374   |          |        |        |
| SID21211 | 5 | 1.3506 | 0.19017 | <0.001   | <0.001   | <0.001   | <0.001   | <0.001   | 0.1517   | 0.0327   | <0.001   | 0.0554   | 0.1291   | 0.0114   | 0.02     | 0.1999   | 0.0443  | 0.1966  | <0.001  | <0.001   | <0.001  | 0.065    | 0.8515   | 0.9579   | 0.9895   | 0.5467   | 0.025    | 0.6835   |          | <0.001   | 0.9195   | 0.7469   | 0.1      |          |          |        |        |

# A 16S rRNA phylogenetic tree

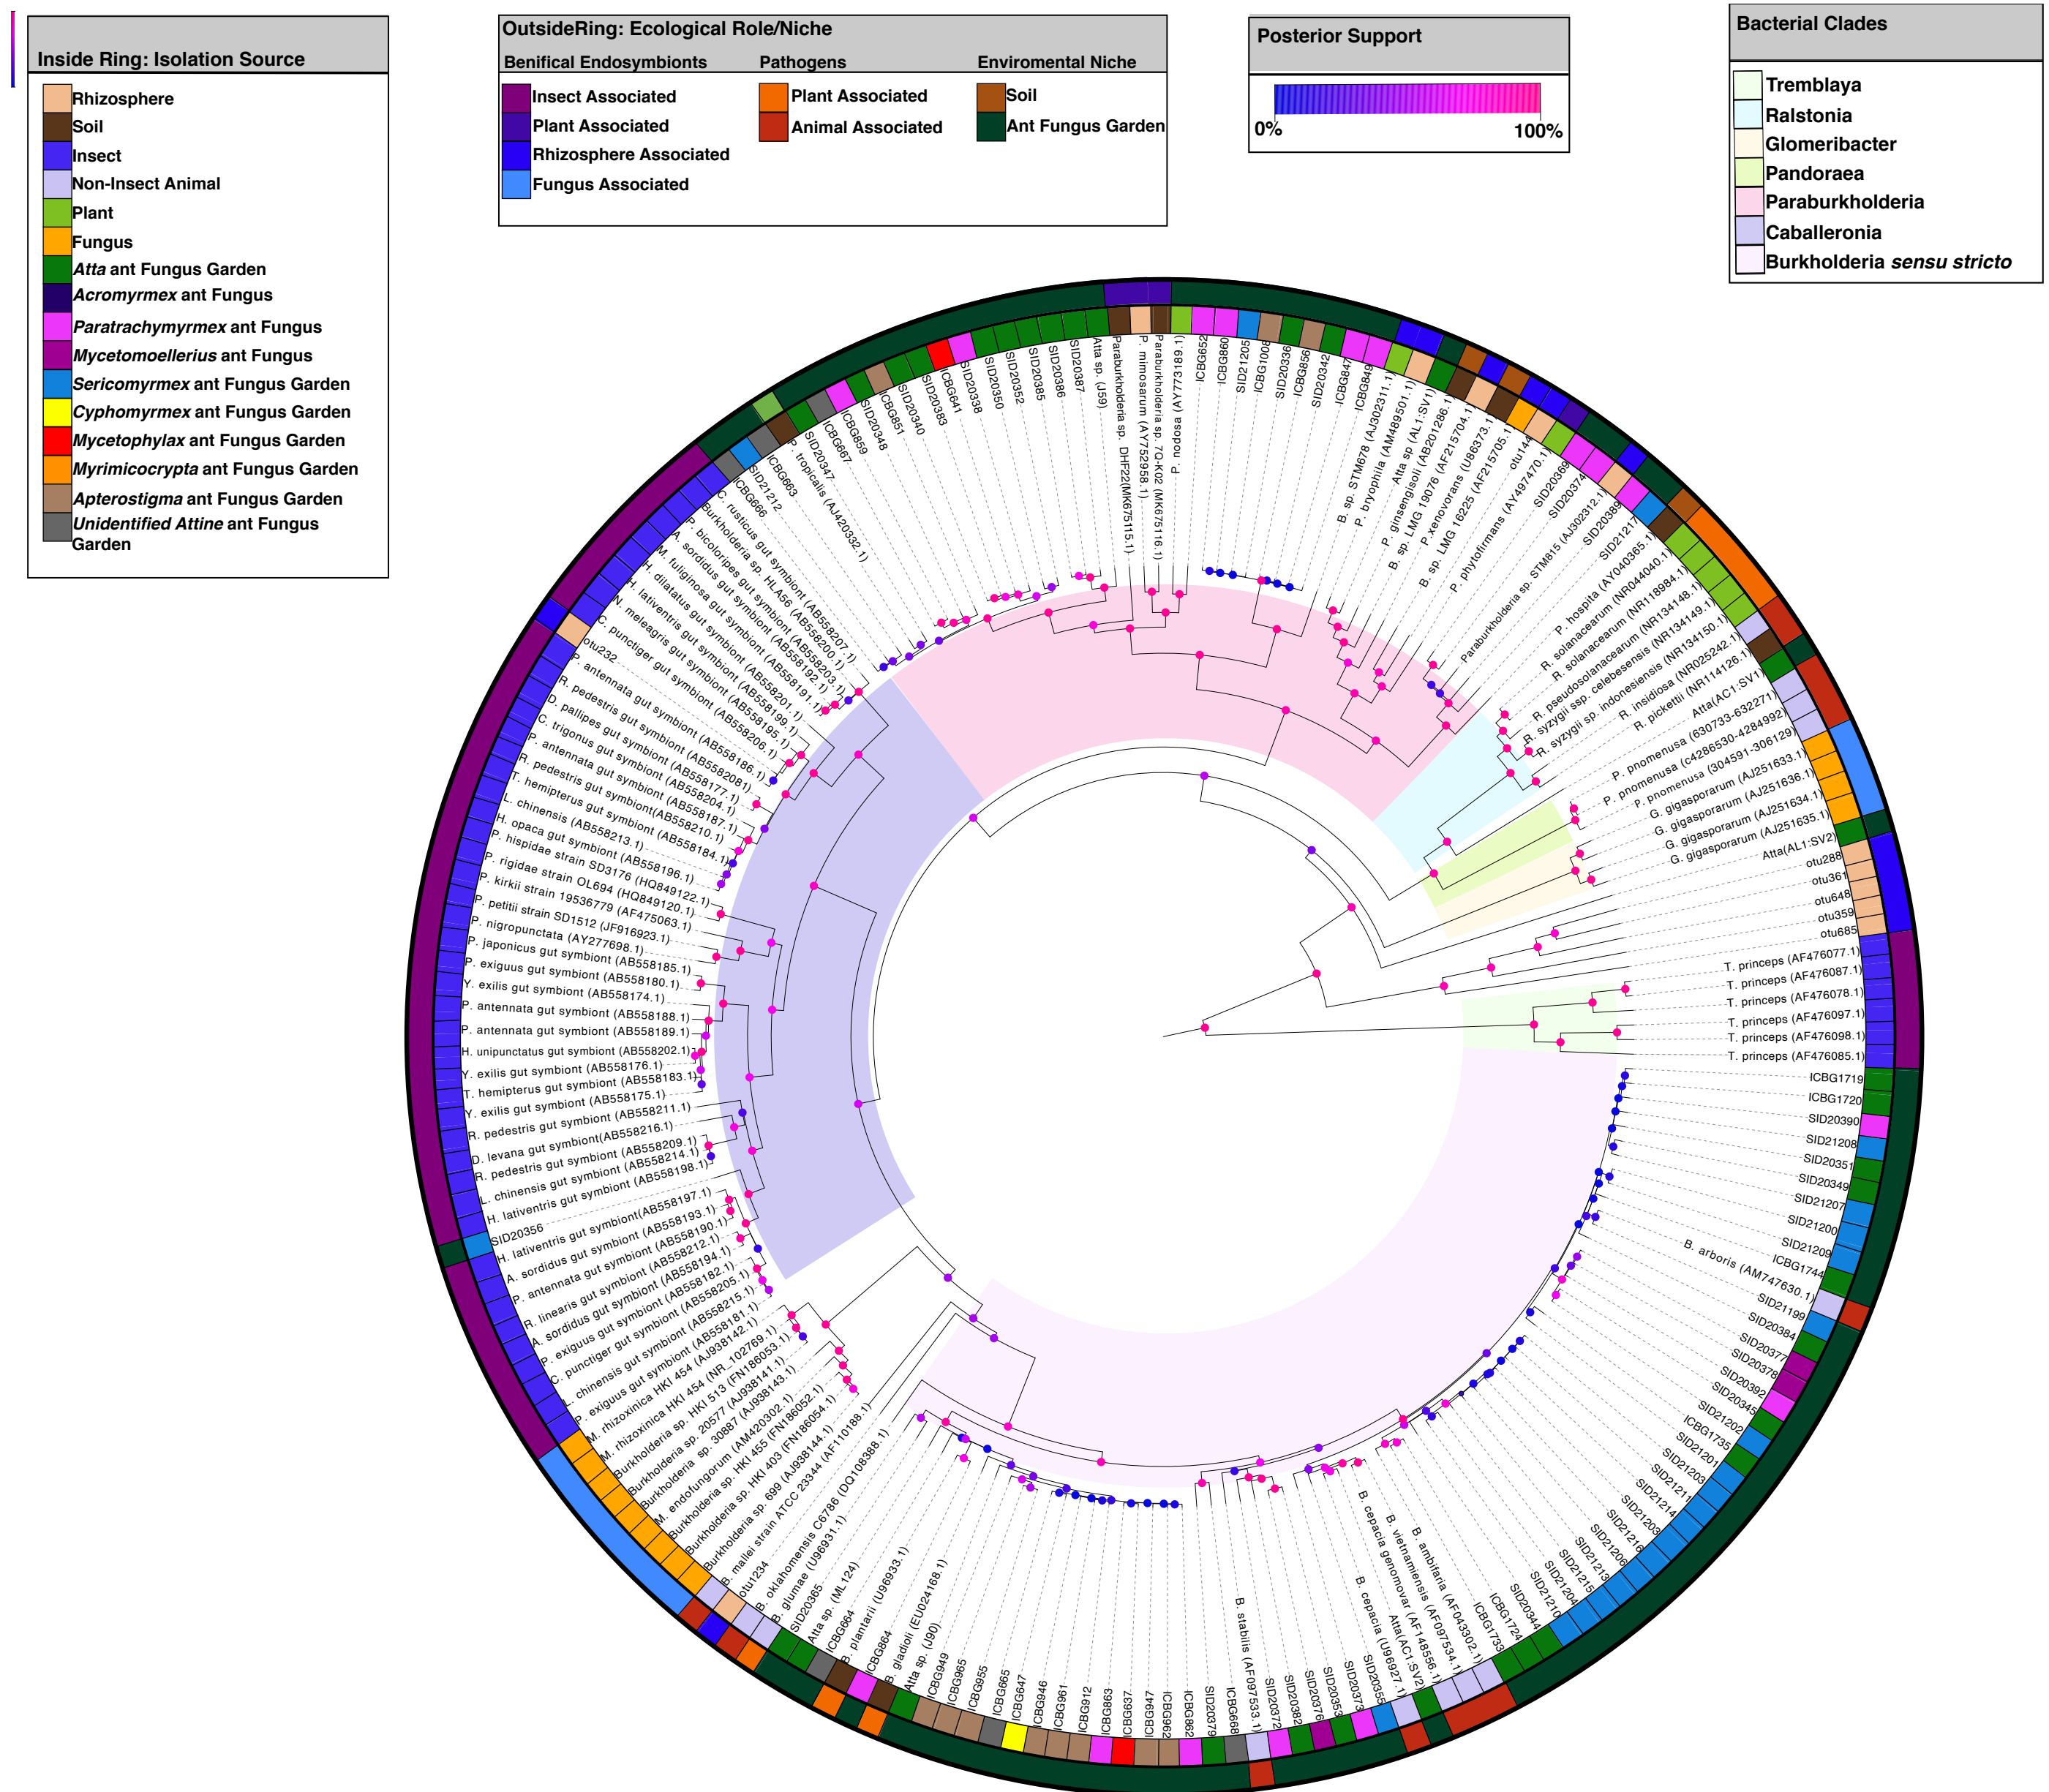

# B Whole genome phylogenetic tree

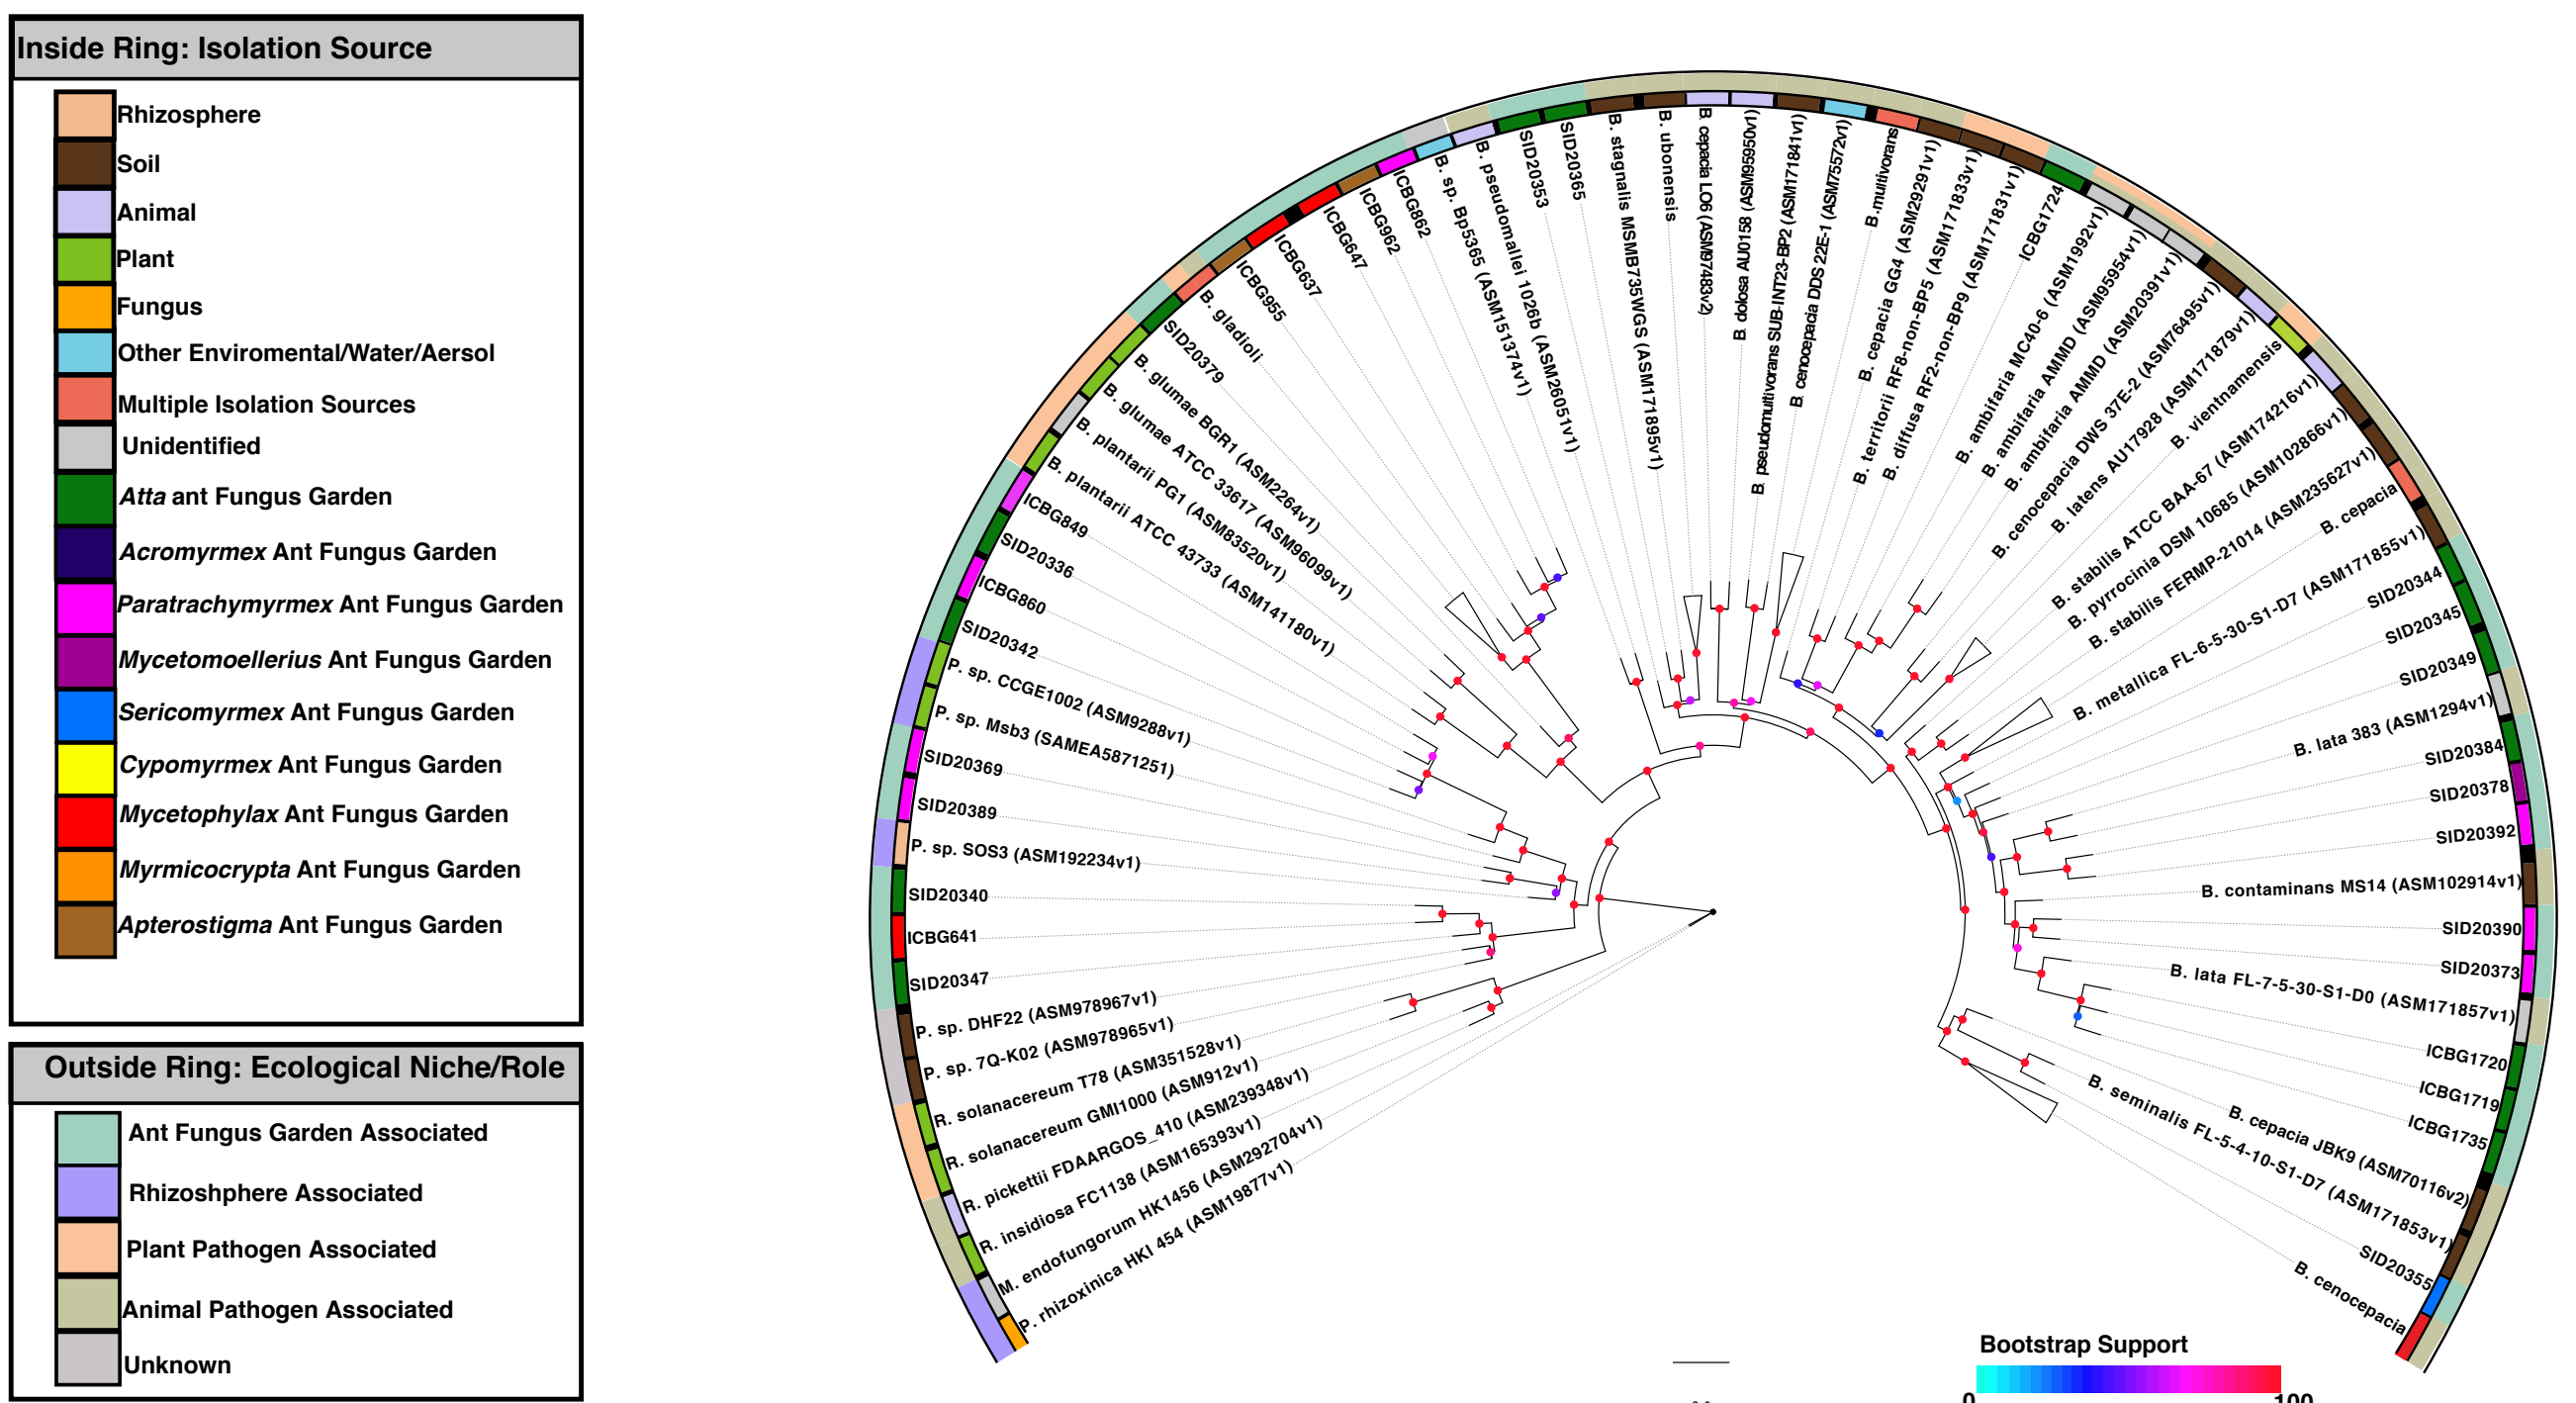

Figure S1. 16S rRNA gene (A) and whole genome (B) phylogenies of *Burkholderiaceae* isolates.

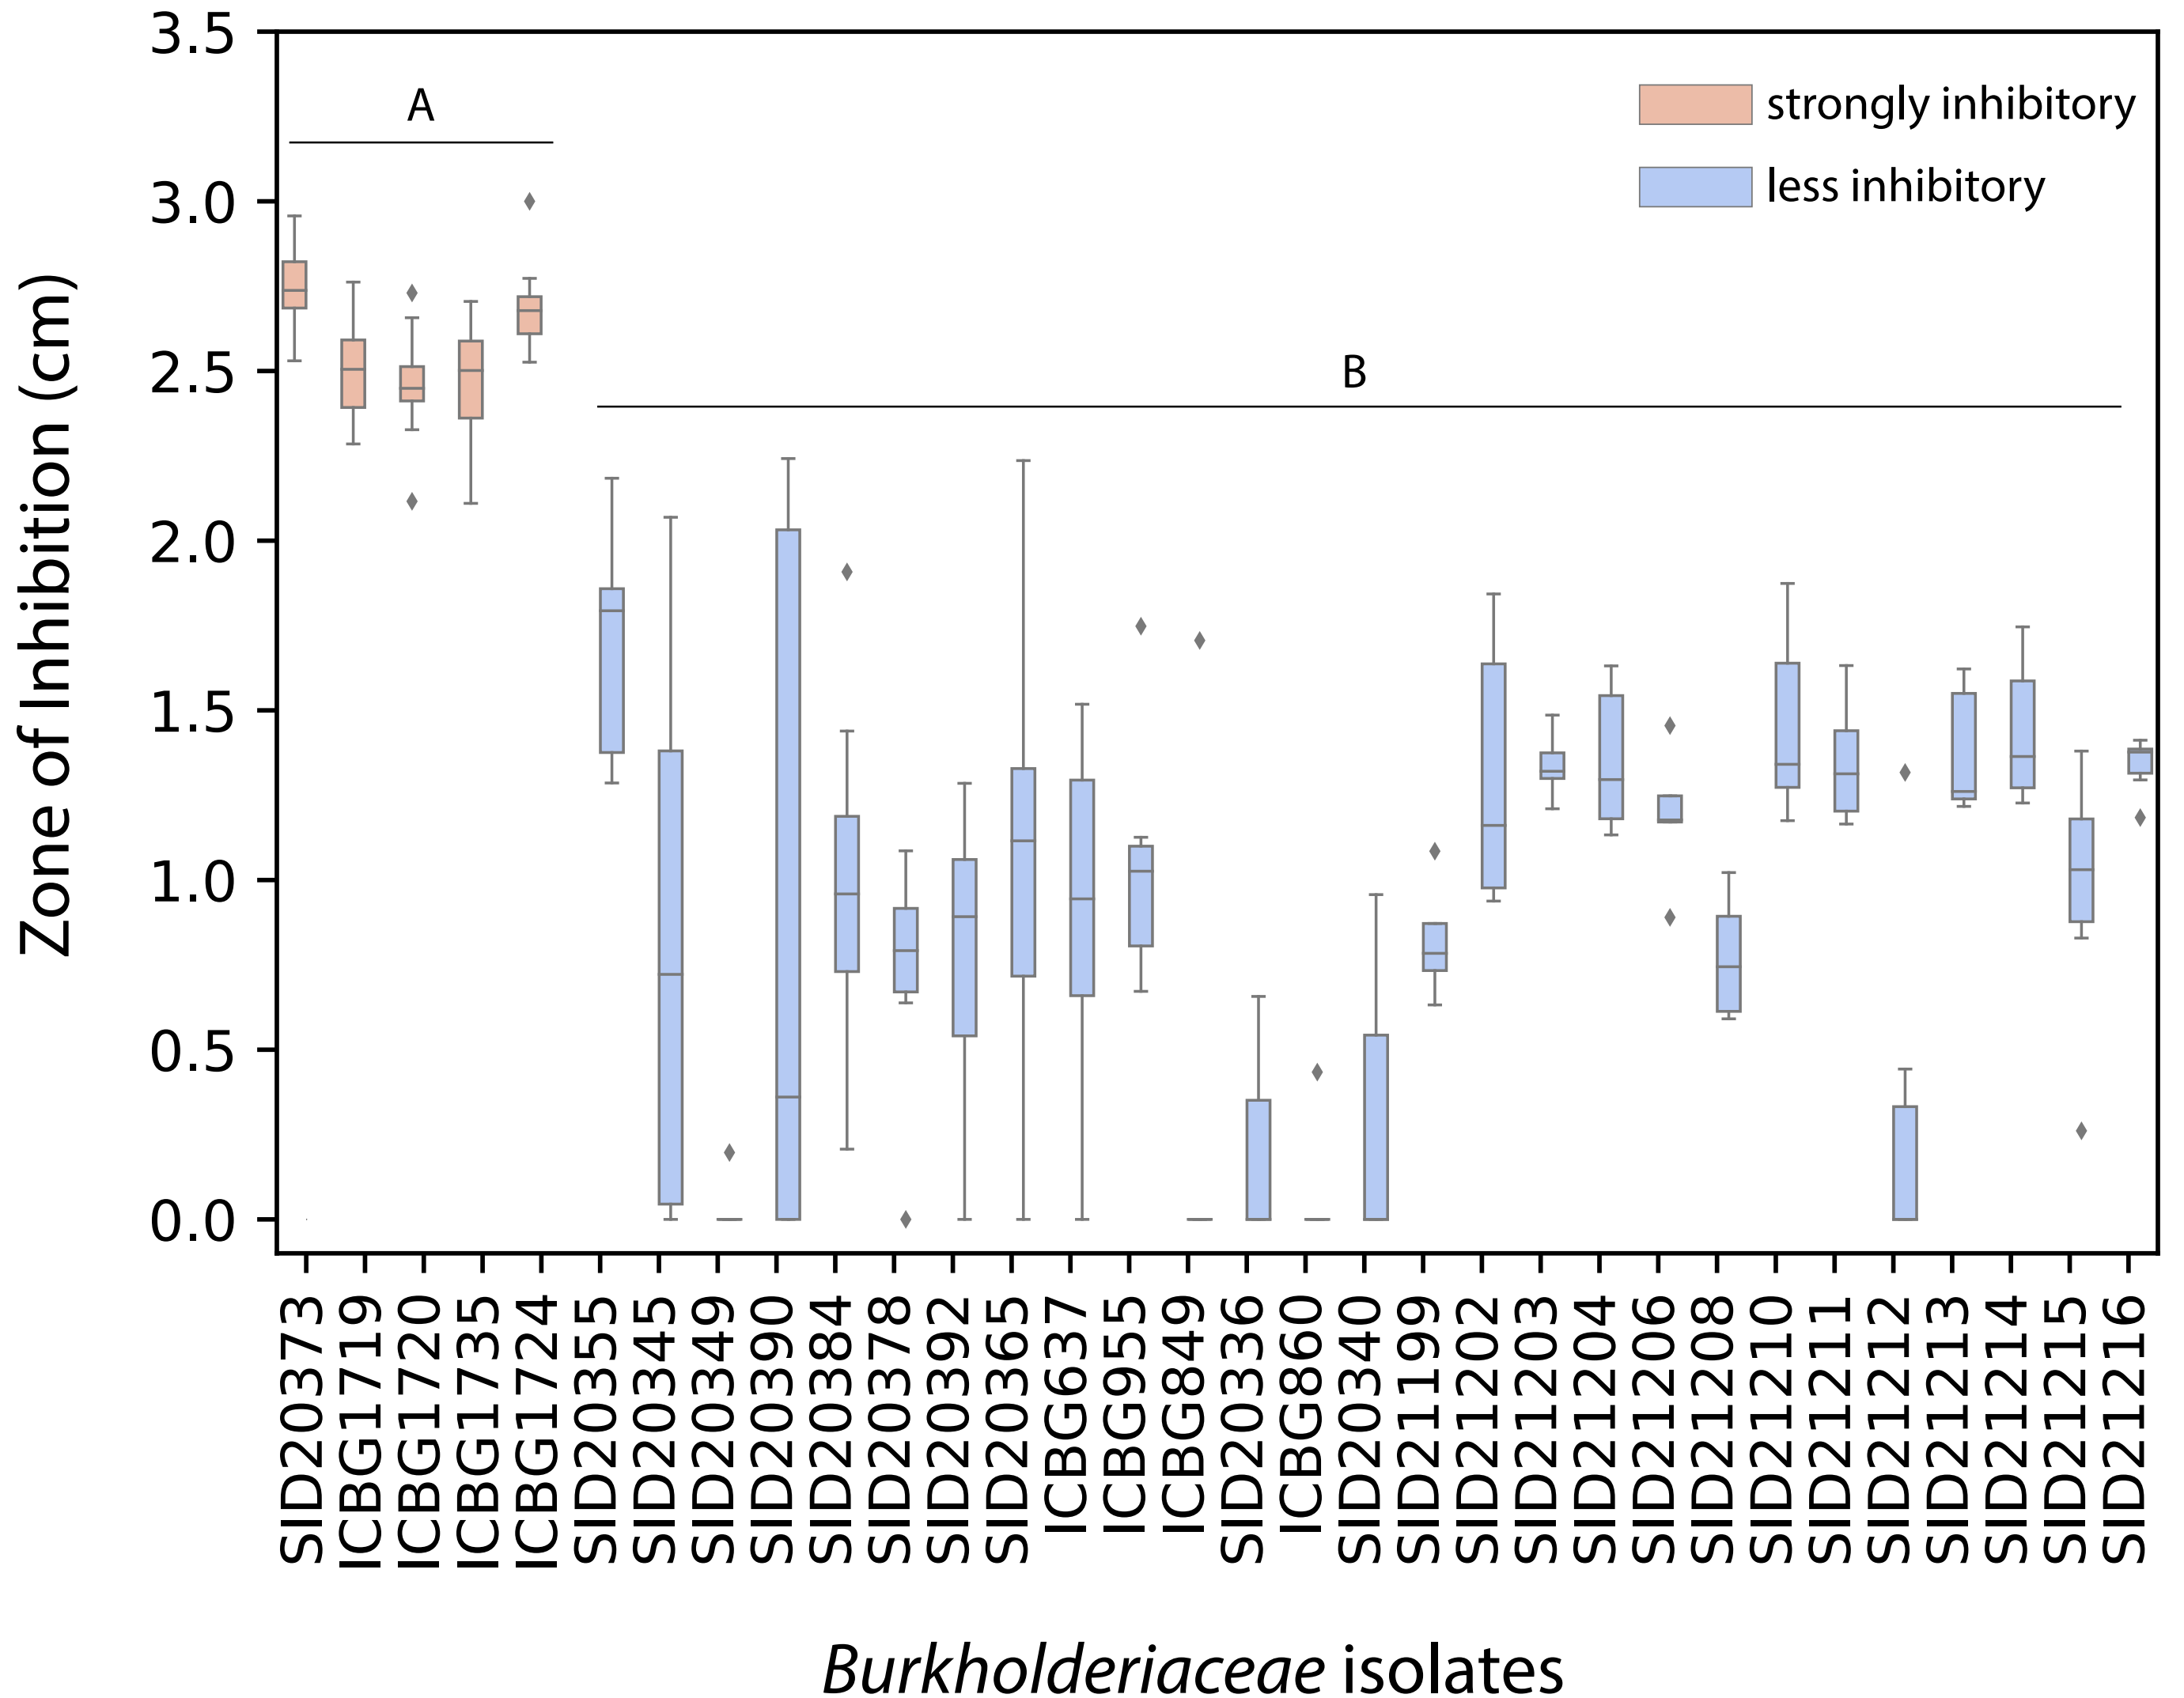

**Figure S2.** Zones of inhibition (ZOI) of *Escovopsis* spp. by all 32 *Burkholderiaceae* isolates. Red boxplots indicate isolates with significantly higher ZOIs (ZOI  $\geq$  2.45 cm). Blue box-plots have significantly lower ZOIs (ZOI < 2.45 cm). A one-way ANOVA test [F(31,192)=24.41,  $p < 0.0001$ ] was used to assess significance between strong inhibitory and less inhibitory isolates. The post-hoc Student's t-test between all pairings are provided in Table S1.

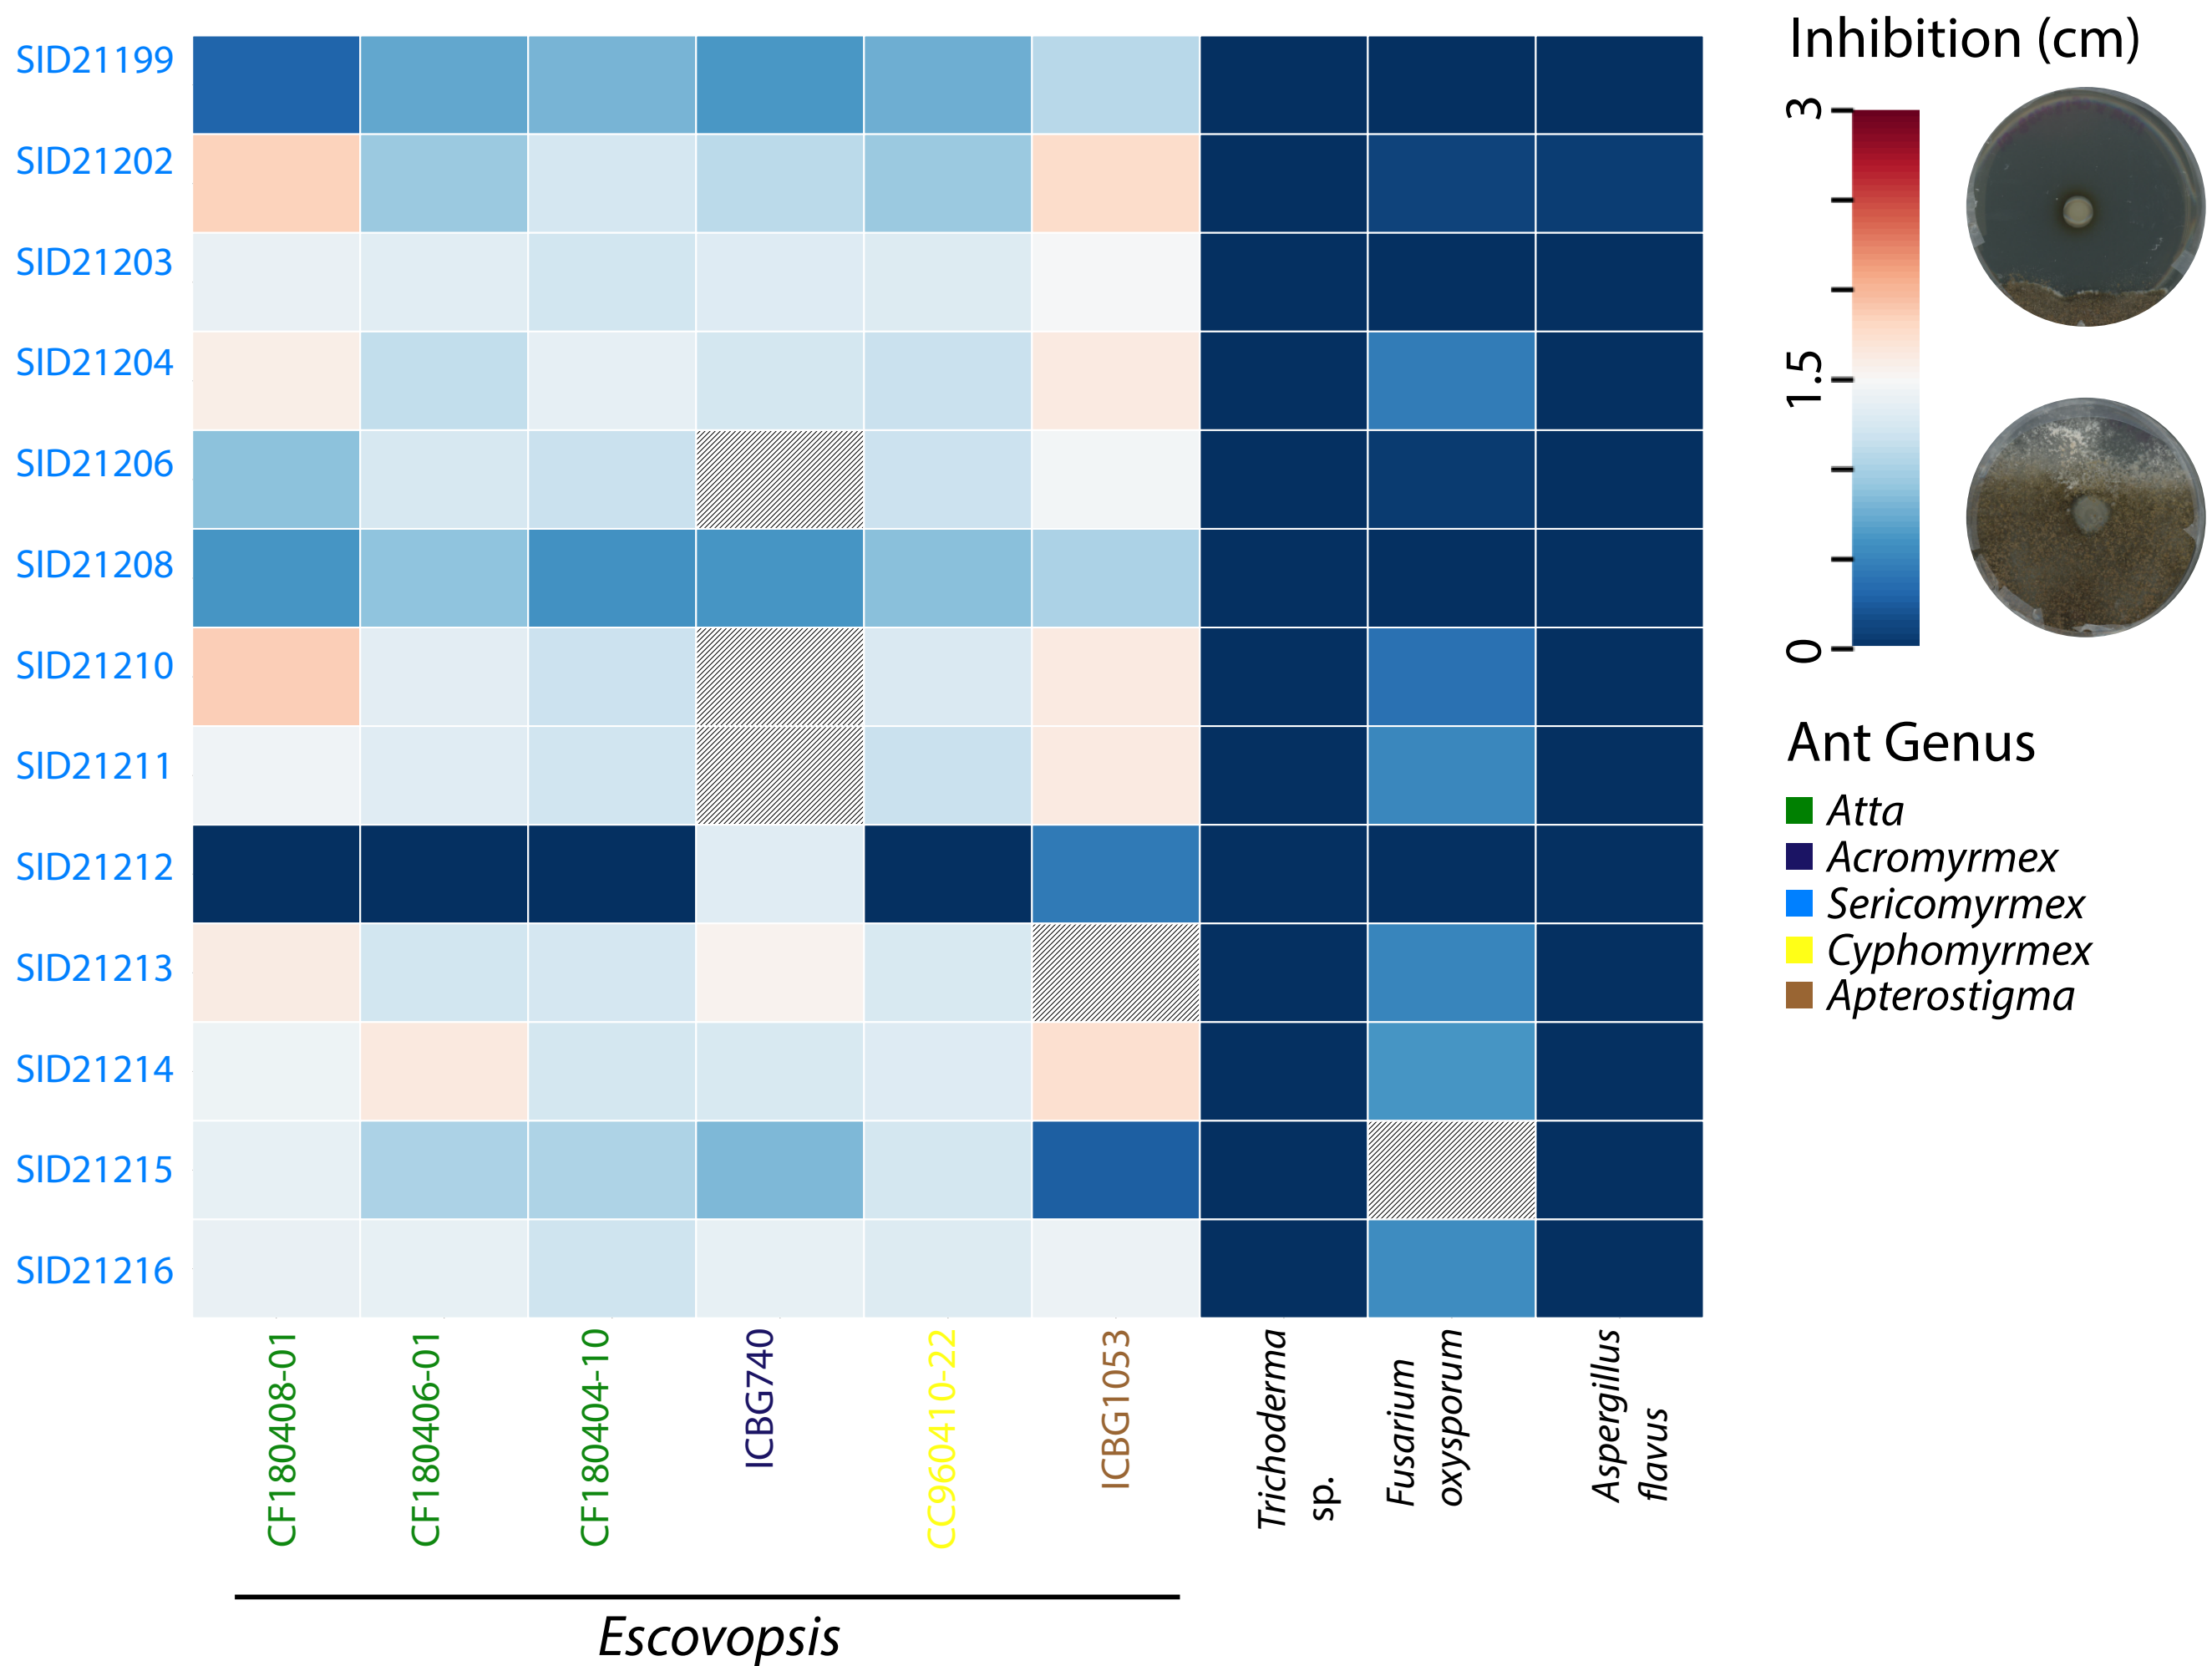

**Figure S3.** 13 additional *Burkholderiaceae* isolates from *Sericomyrmex amabilis* colonies were tested against *Escovopsis* spp. Hatched squares indicate the pairings that could not be measured due to various contamination and growth complications.

A

A - 1719  
B - 1720  
C - 1724  
D - 1735  
E - 20373  
F - 20345  
G - 20355  
H - 20365  
I - 20378  
J - 20392

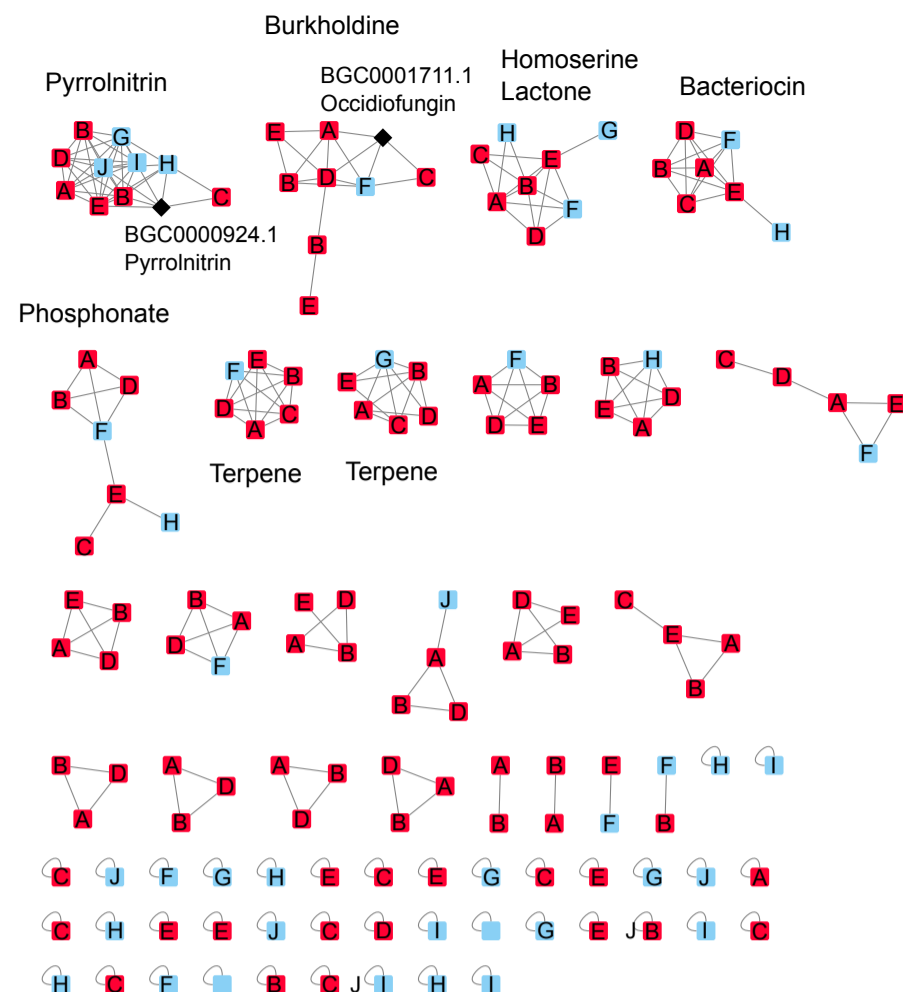

B

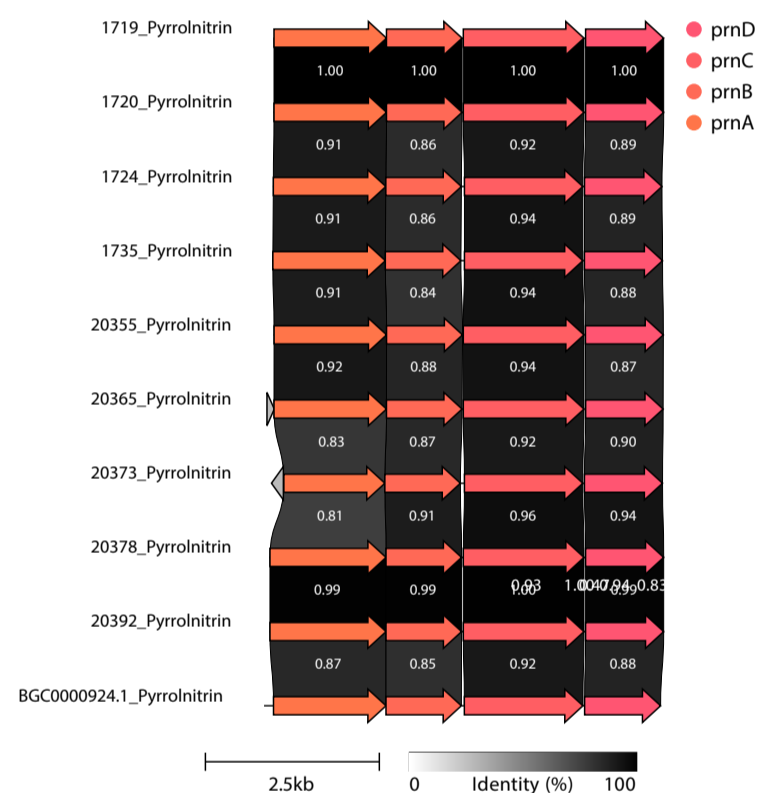

C

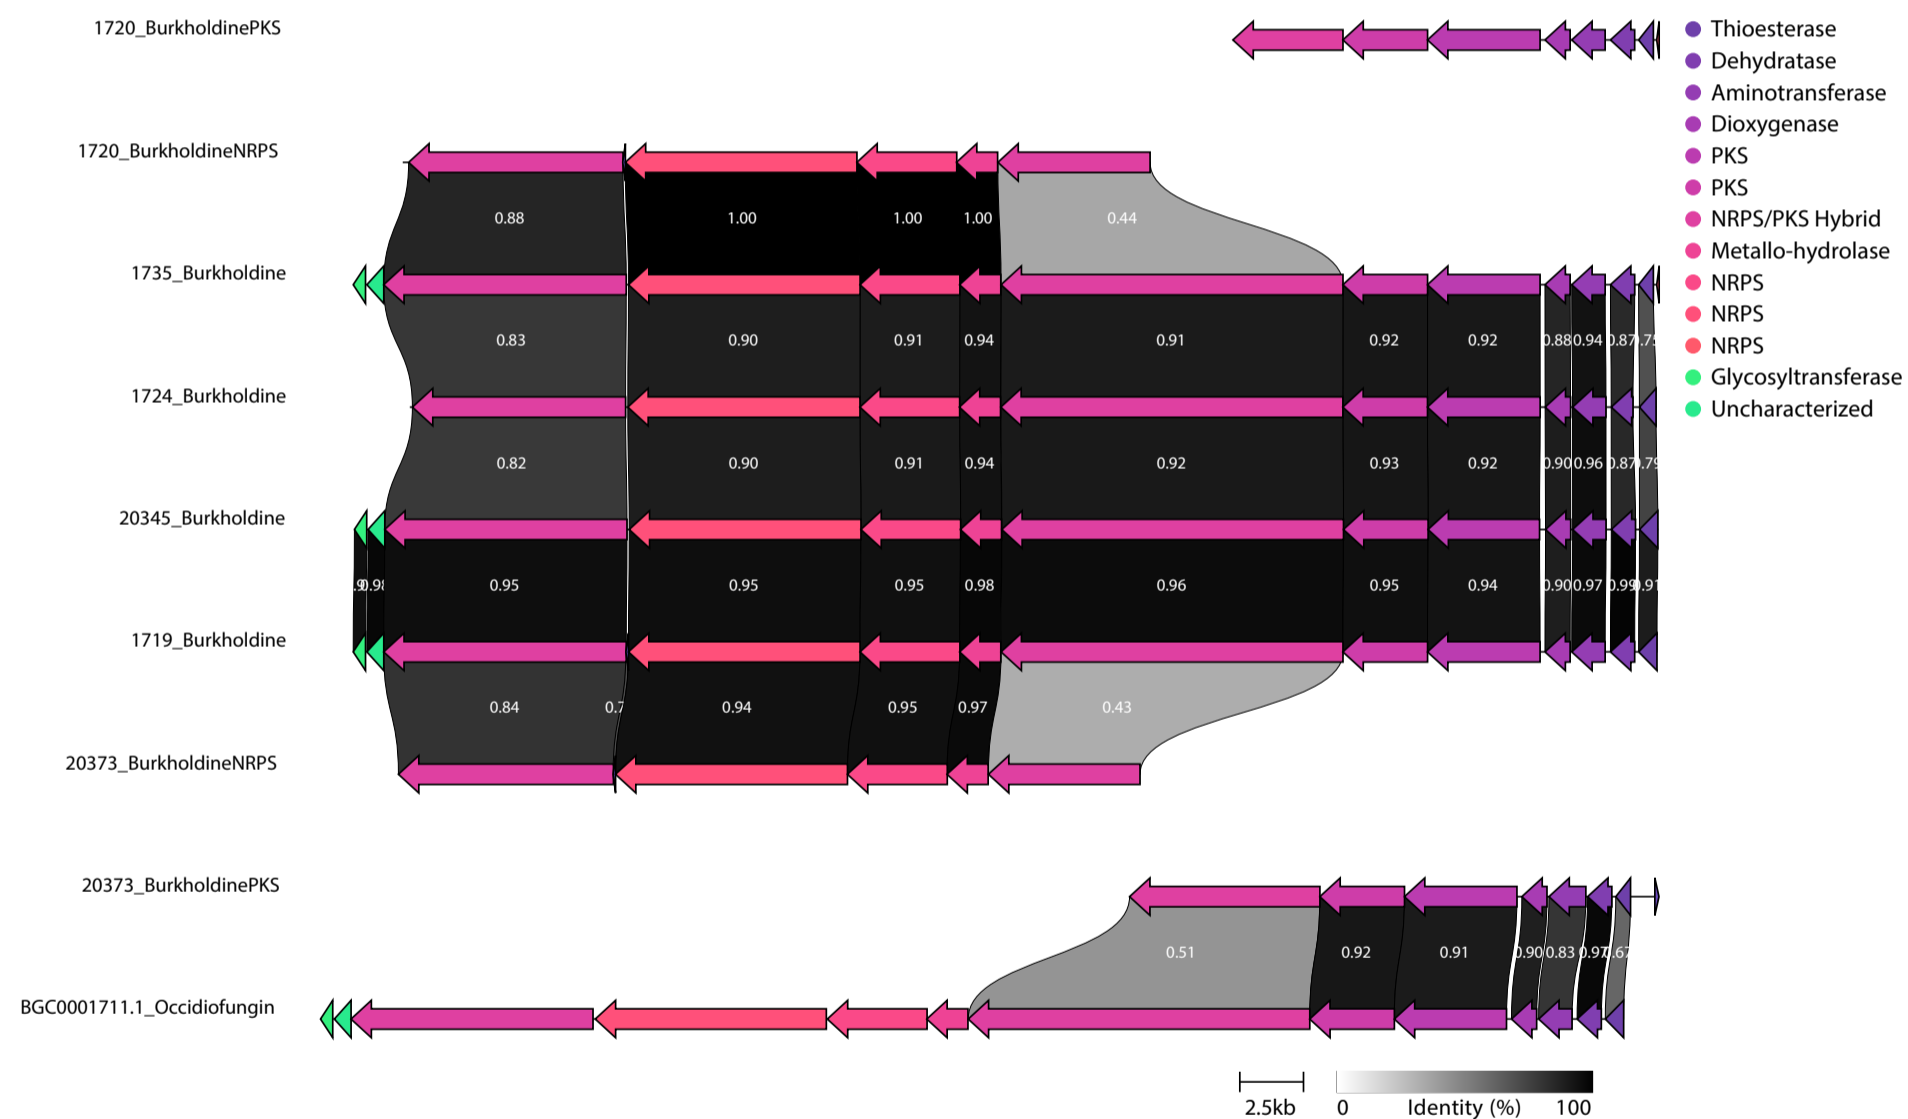

**Figure S4.** (A) BiG-SCAPE analysis of selected *Burkholderia* isolates. Red nodes represent biosynthetic gene clusters (BGCs) that were detected in strong inhibitory strains and blue nodes represent BGCs detected in non-inhibitory strains. Black diamond nodes represent characterized BGCs from the MIBiG database. Nodes are labeled by the genomes of the strains they were detected in and subnetworks that contain all inhibitory strains are labeled based on their antiSMASH designation or closest match to a known MIBiG BGC. (B) Alignment and percent similarity of the pyrrolnitrin BGCs identified by antiSMASH and the characterized pyrrolnitrin BGC from the MIBiG database. Arrows that are the same color represent genes that share at least 75% similarity. (C) Alignment and percent similarity of the burkholdine BGCs identified by antiSMASH and the characterized occidiofungin BGC from the MIBiG database. Arrows that are the same color represent genes that share at least 75% identity. The burkholdine BGCs for ICBG1720 and SID20373 were split across separate contigs; however, they share strong similarity to the complete BGCs in other strains.

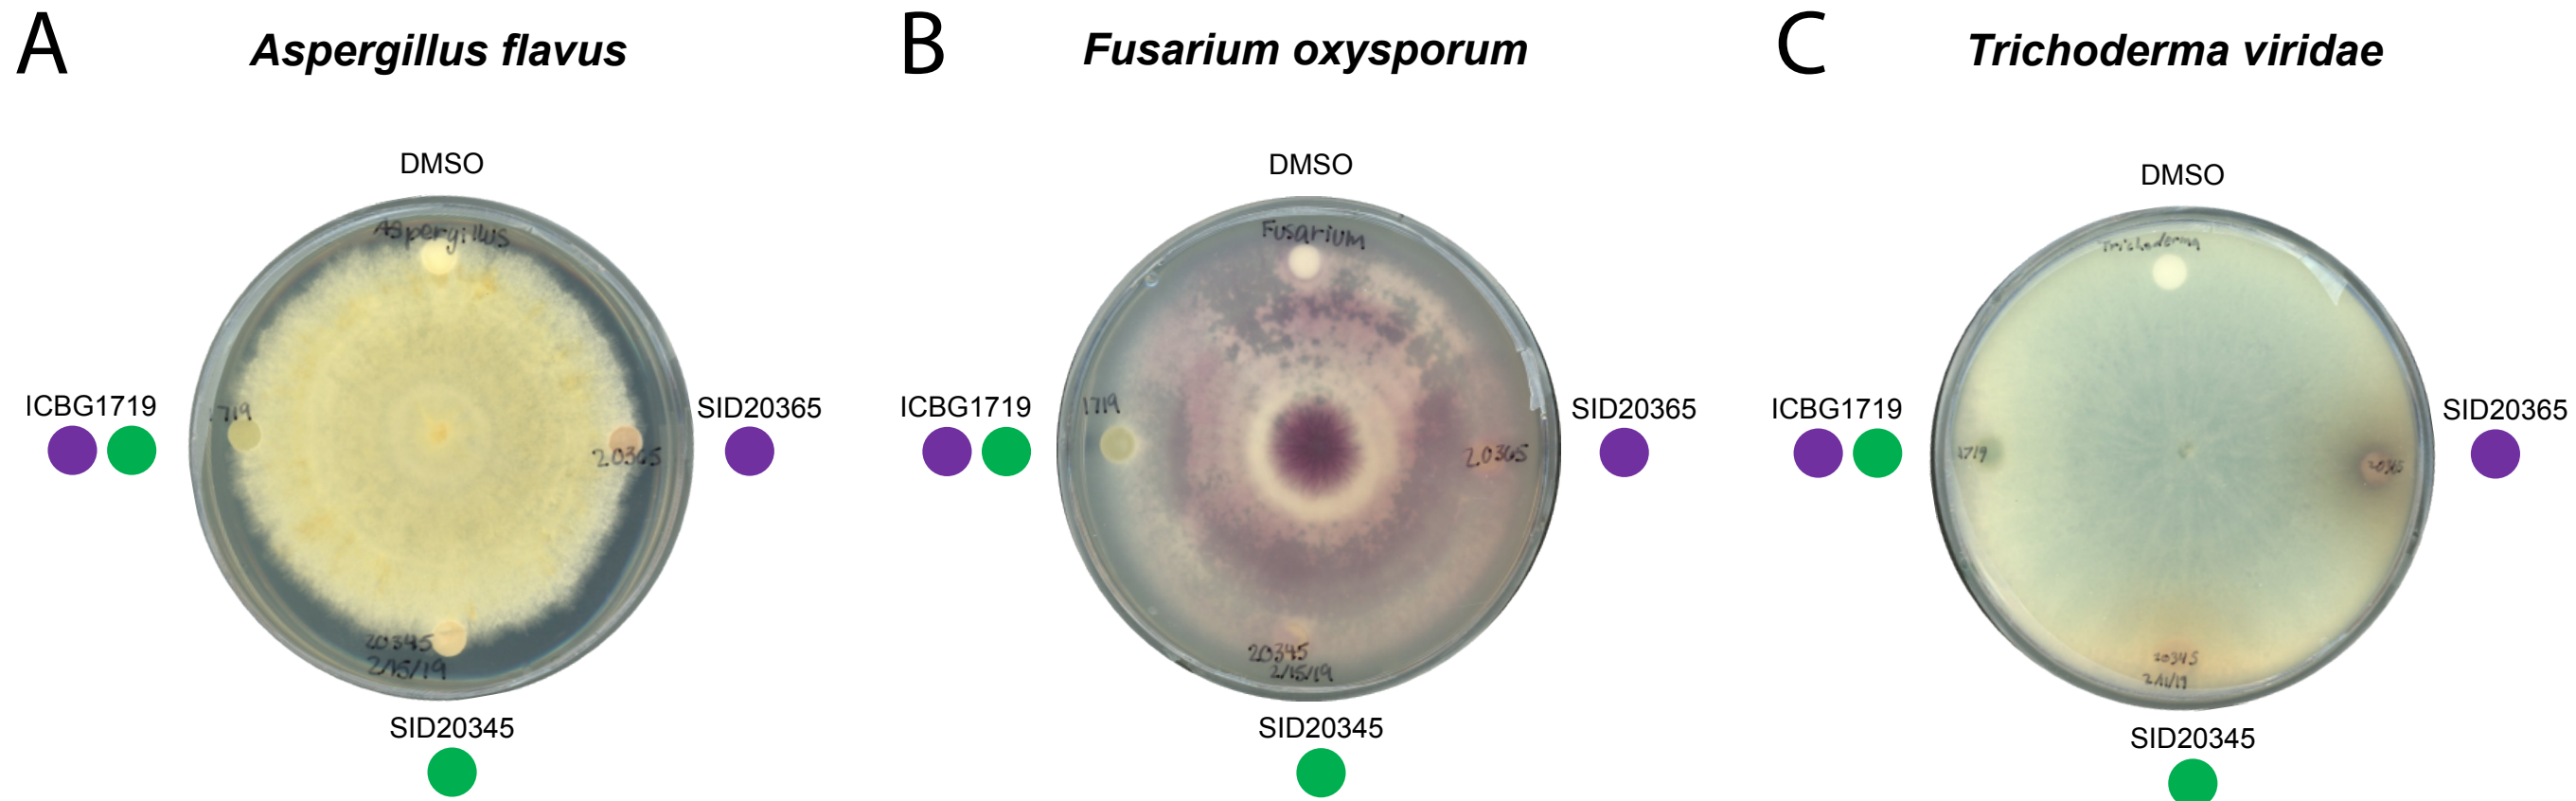

**Figure S5.** Disc diffusion assay of extracts from ICBG1719 (contains both pyrrolnitrin and burkholdine1213) and a combined extract of SID20345 (contains burkholdine1213) and SID20365 (contains pyrrolnitrin) against (A) *Aspergillus flavus* (B) *Fusarium oxysporum* and (C) *Trichoderma* sp. Green circles indicate the presence of burkholdine1213 and purple circles indicate the presence of pyrrolnitrin.

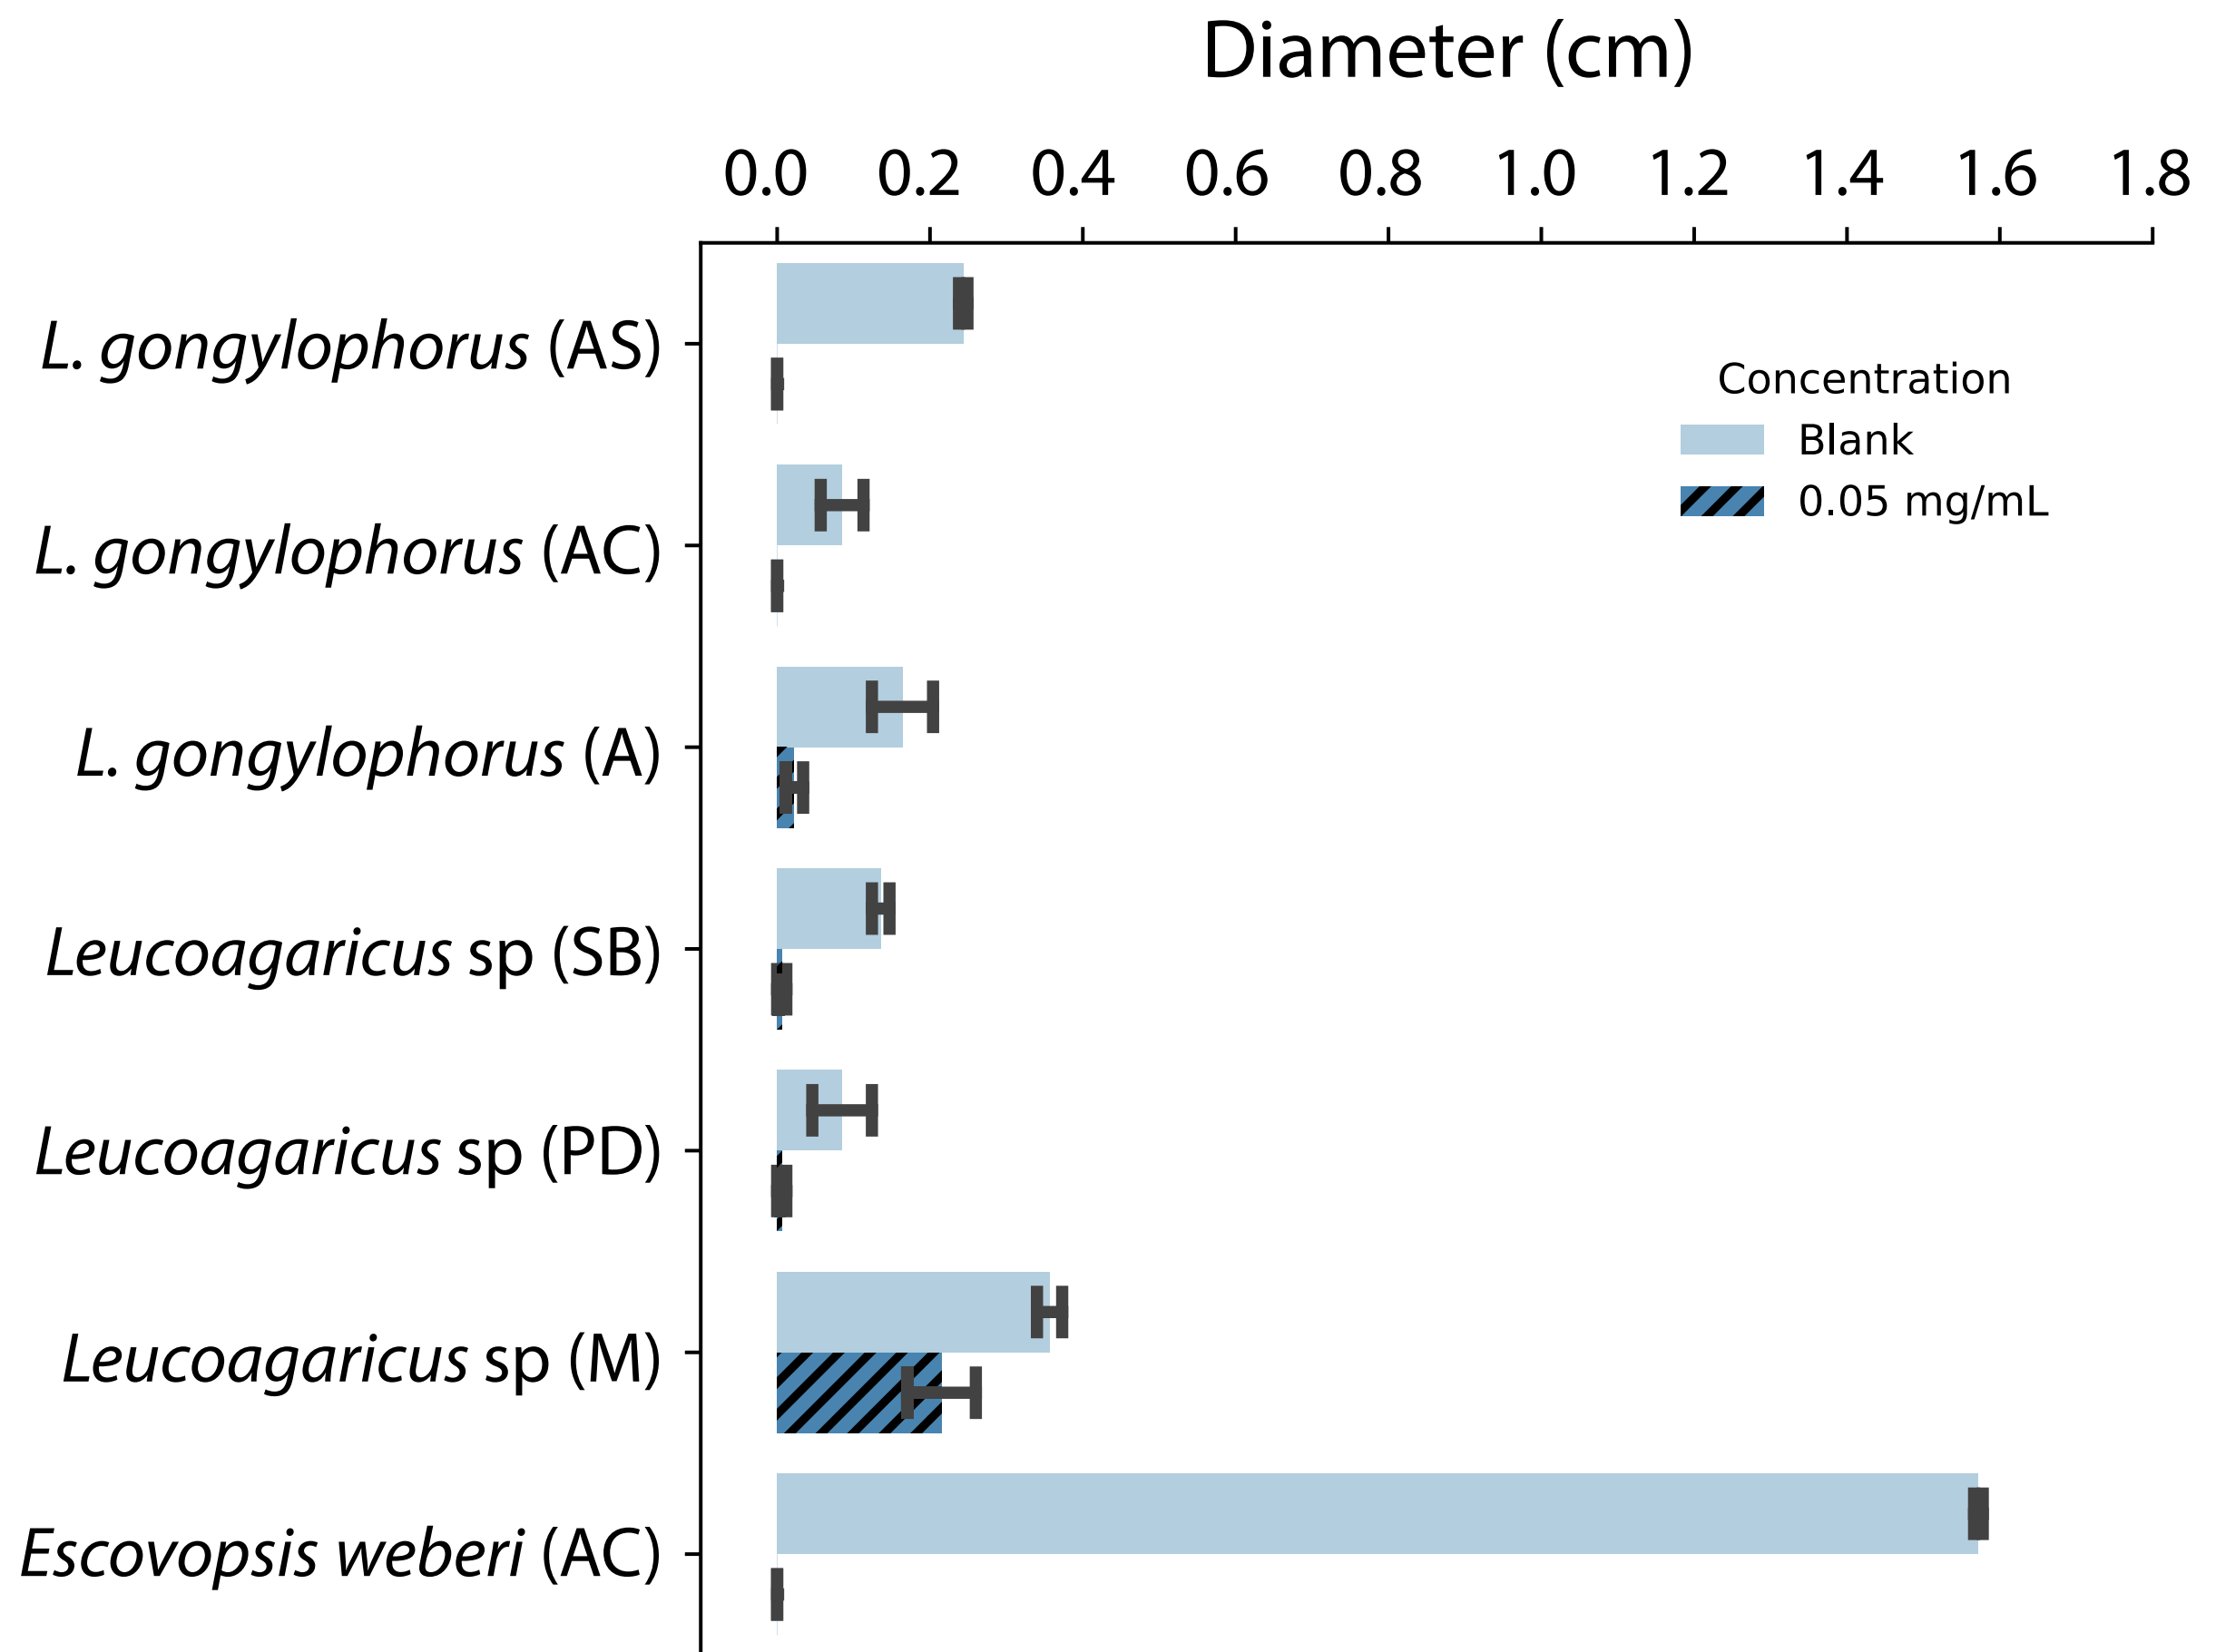

**Figure S6.** *Leucoagaricus* spp. and *Escovopsis weberi* (CF180408-01) grown on agar containing 0.05 mg/mL ICBG1719 extract (contains both pyrrolnitrin and burkholdine1213). Bar graph indicates the growth of *Leucoagaricus* spp. (n=2 for each strain) and *Escovopsis weberi* (n=3) after six days of growth on agar containing no extract (blank) or 0.05 mg/mL extract. AS = *Atta sexdens*, AC=*Atta cephalotes*, A=*Acromyrmex* sp., SB=*Sericomyrmex bondari*, PD=*Paratrachymyrmex diversus*, M=*Myrmicocrypta* sp.
